# Supplementary material
Source: PubMed Central journal article supplement (PMC3091956)
Supplement: NIHMS289515-supplement-1.pdf [file NIHMS289515-supplement-1.pdf]

## Appendix A: Supplementary data

### Supplementary Figure S1. Global Comparison of $(h+k)=\text{even}$ versus $(h+k)=\text{odd}$

An analysis of phase relationships in the projection data of the rectangular crystal forms suggested the presence of  $c222$  symmetry. In this two-sided plane group, reflections for which  $(h+k)=\text{odd}$  are absent everywhere in the molecular transform. However, due to noise and local breaks of symmetry, these absences are not always strictly observed in the images, which would preclude enforcement of the symmetry and adversely affect calculations of phase origins as well as lattice lines. To independently confirm that the symmetry was present in the 3D data, we analyzed the signal-to-noise ratio distribution in the two populations of reflections. Specifically,  $(h+k)=\text{even}$  (white bars) and  $(h+k)=\text{odd}$  (dark bars) were written out into separate data files. The files were then merged using the phase origins that had been calculated for the  $(h+k)=\text{even}$  set, and the quality of the signal-to-noise ratio (IQ) was tabulated for each of the two data sets by simply counting the IQ1-8 reflections in each data set. The average IQ was 5.7 for  $(h+k)=\text{even}$  and 7.2  $(h+k)=\text{odd}$ . The histograms further illustrated that the vast majority of measurements with high to moderate signal-to-noise ratios were contained in the  $(h+k)=\text{even}$  half of the data. This was consistent with the presence of  $c222$  symmetry. Moreover, the histogram distribution also justified the removal of the  $(h+k)=\text{odd}$  reflections, which ultimately have to be eliminated from the data at any rate if  $c222$  symmetry were to be enforced.

### Supplementary Figure S2. Phase errors for projection data

The program PLOTALL was used to plot the individual phase error for each structure factor after averaging of data from the various images. Phase errors are encoded as follows: 1,  $<8^\circ$ ; 2,  $<14^\circ$ ; 3,  $<20^\circ$ ; 4,  $<30^\circ$ ; 5,  $<40^\circ$ ; 6,  $<50^\circ$ ; 7,  $<80^\circ$ ; 8,  $<90^\circ$ , where  $90^\circ$  is random; errors larger than  $30^\circ$  are indicated by decreasing box sizes. A) Phase error plot for data of unstained stargazin crystals belonging to the less complex of the two  $c222$  forms. Data were averaged in  $p1$ , which is the reason why the full half of the transform is shown. While averages were significant to better than  $10\text{\AA}$ , the projection was only calculated to  $15\text{\AA}$  because completeness of the data beyond that resolution was low. Phase error plots for the simple (B) and complex (C)  $c222$  forms. D) Phase error plot for the  $p6$  crystal form. B)-D) all plots represent the combined phase error obtained after averaging and rounding to  $0/180^\circ$ .

### Supplementary Figure S3. 6xHis-Stg 2D class averages

Particles were boxed out from seventeen raw micrographs using semi-automated particle picking in EMAN into boxes of  $100\times 100$  square pixels (Ludtke et al., 1999). The raw particles were normalized, high- and low-pass filtered, and centered. After discarding bad particles, 2548 particles were subjected to several iterations of reference-free 2D alignment and classification using multivariate statistical analysis and multi-reference alignment in IMAGIC to a final 100 classes (van Heel et al., 1996). The scale bar (lower right-hand corner) equals  $100\text{\AA}$ .

### Supplementary Figure S4. Select lattice lines at a range of resolutions

Only the phase part of the fit is shown in each case. Lines are plotted at  $1/\text{\AA}$  along the  $x$ -axis. Resolutions are for the respective  $(h,k,0)$  projection term. Lattice line  $(0,16)$  is

shown to demonstrate that c222 symmetry constraints were obeyed in the 3D-transform.

**Supplementary Figure S5. Point spread function plots for determining effective resolution cutoffs**

Using a point spread function obtained for a simulated data set with an in-plane resolution cutoff of  $16\text{\AA}$  as a reference (A), effective resolution cutoffs were determined by comparison as in-plane cutoffs of  $x = 22.5\text{\AA}$ ,  $y = 20.2\text{\AA}$  (B) and a vertical cutoff of  $31.1\text{\AA}$  (C) from the point spread function of the experimental data. Grid spacing corresponds to  $10\text{\AA}$ . Peaks were contoured at half height (solid line) in line with the Raleigh criterion for resolution.

Supplementary Figure S1

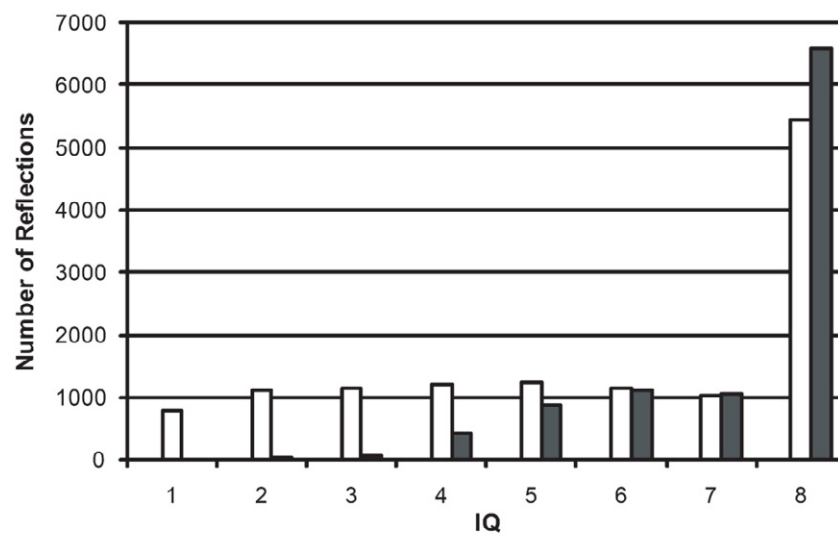

## Supplementary Figure S2

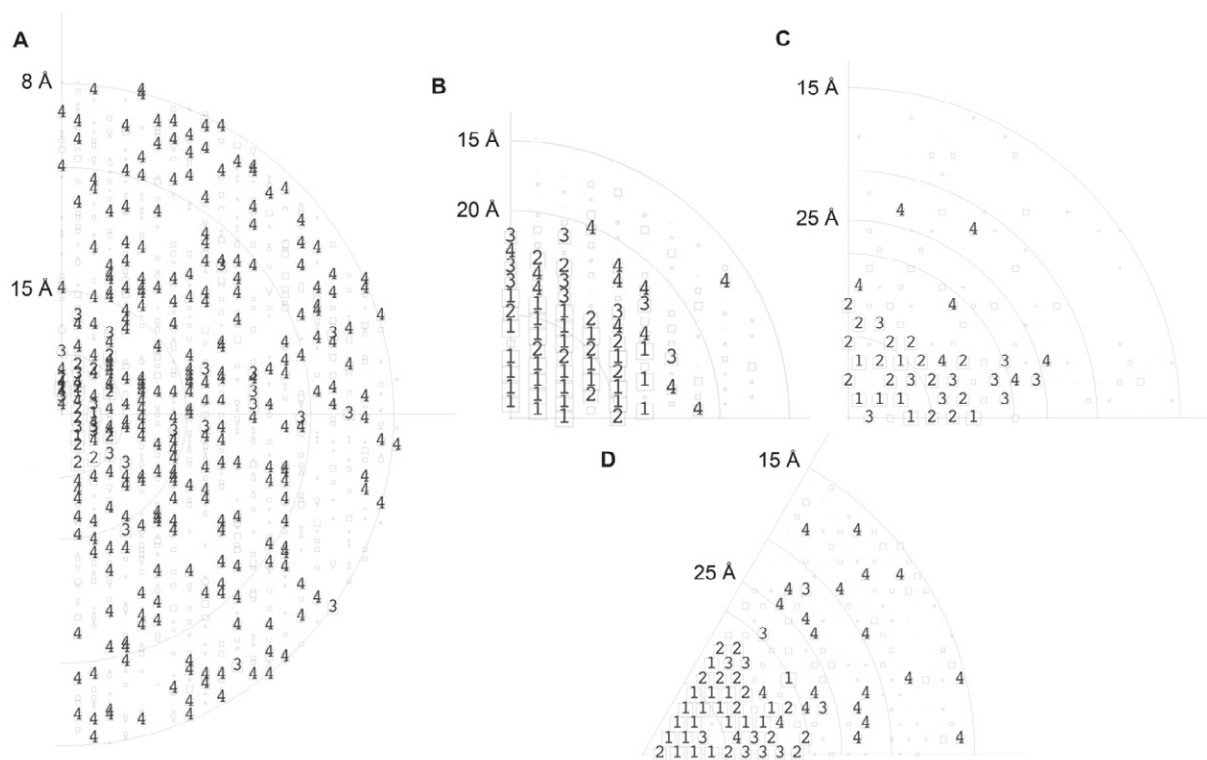

ACCEPTED

Supplementary Figure S3

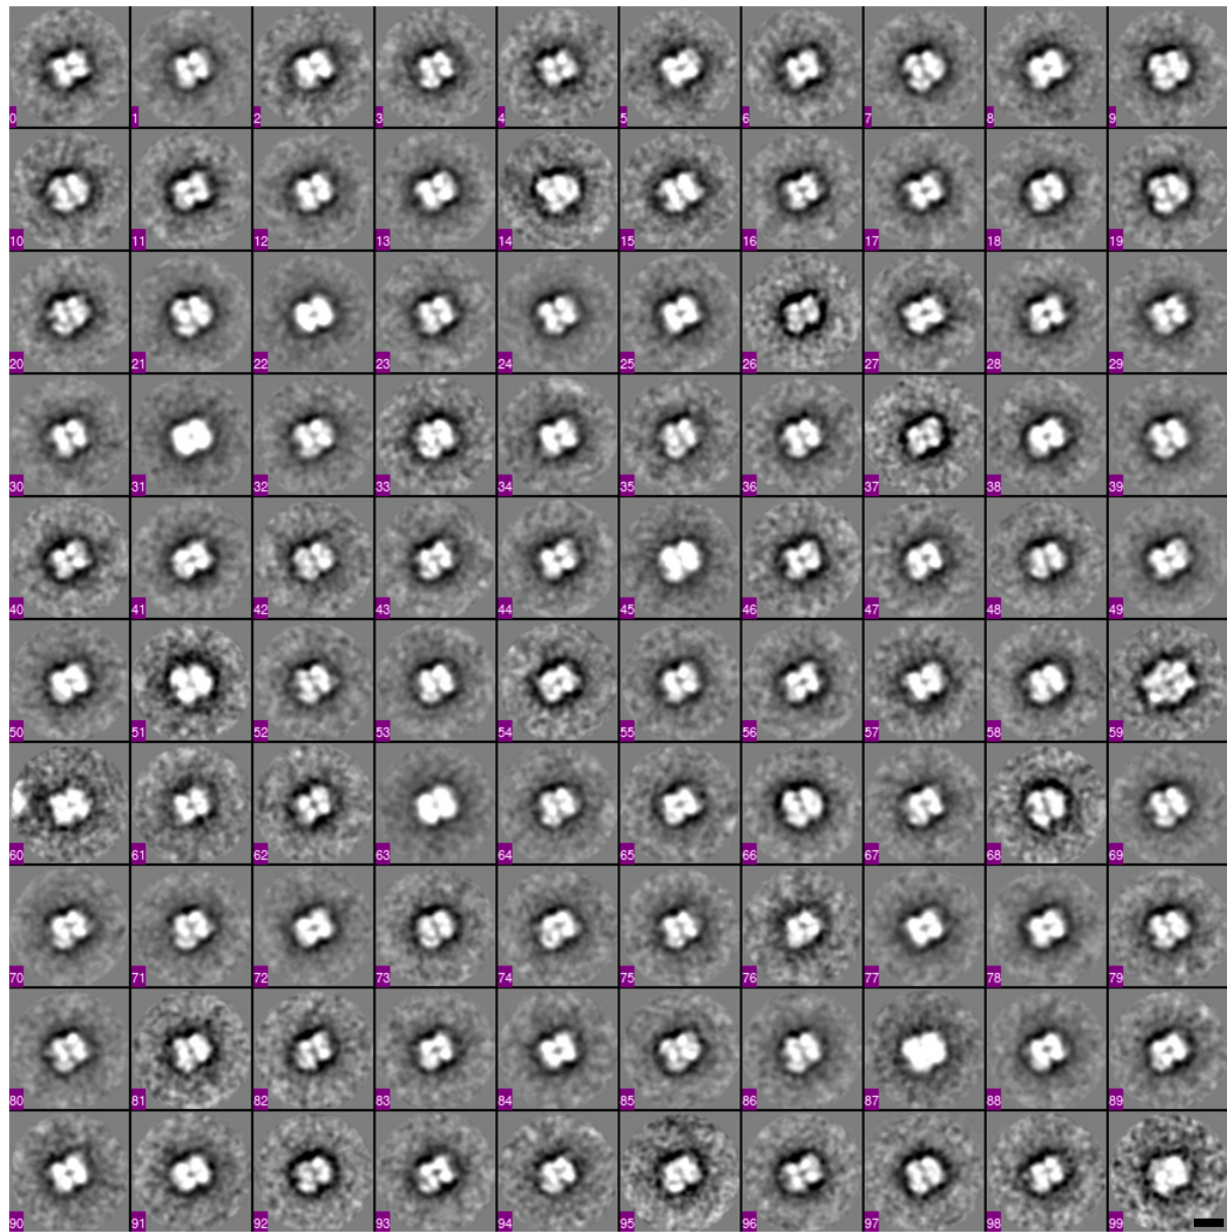

Supplementary Figure S4

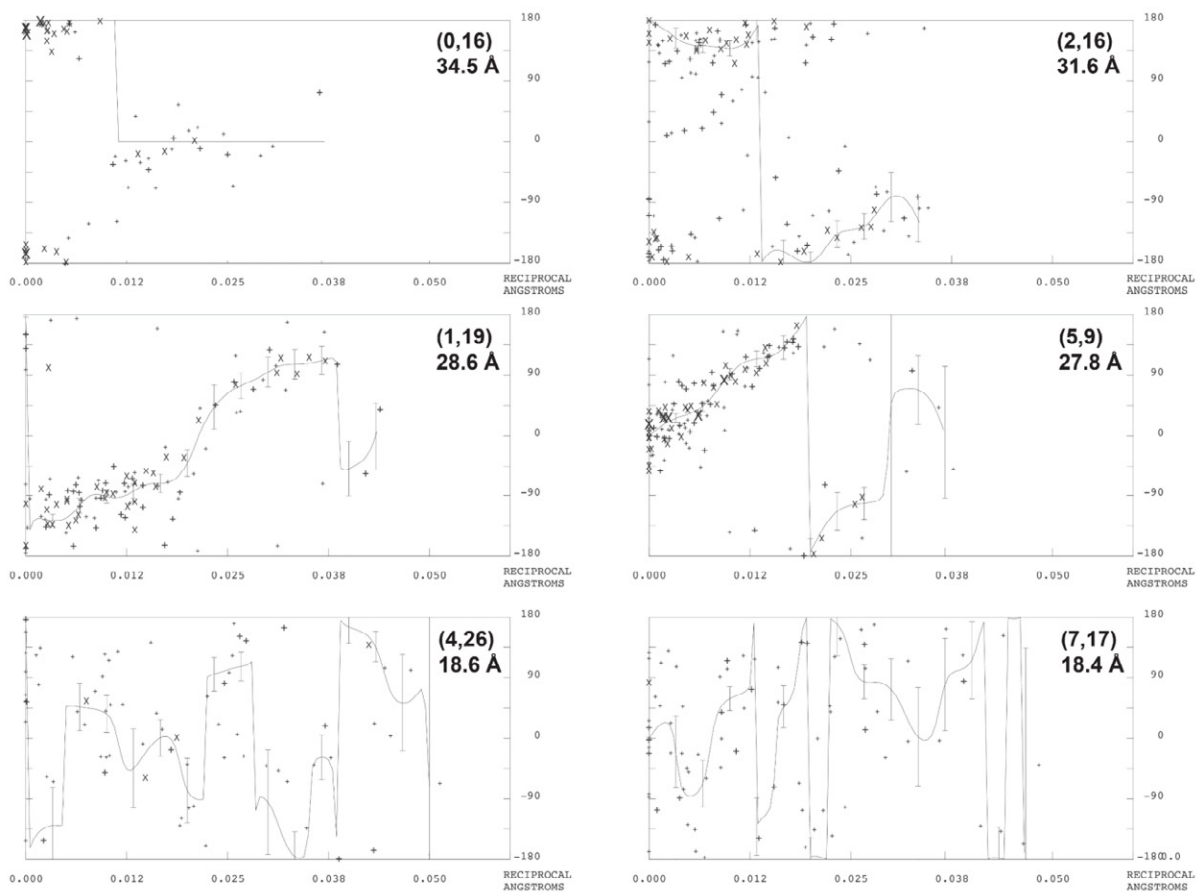

ACCEPT

Supplementary Figure S5

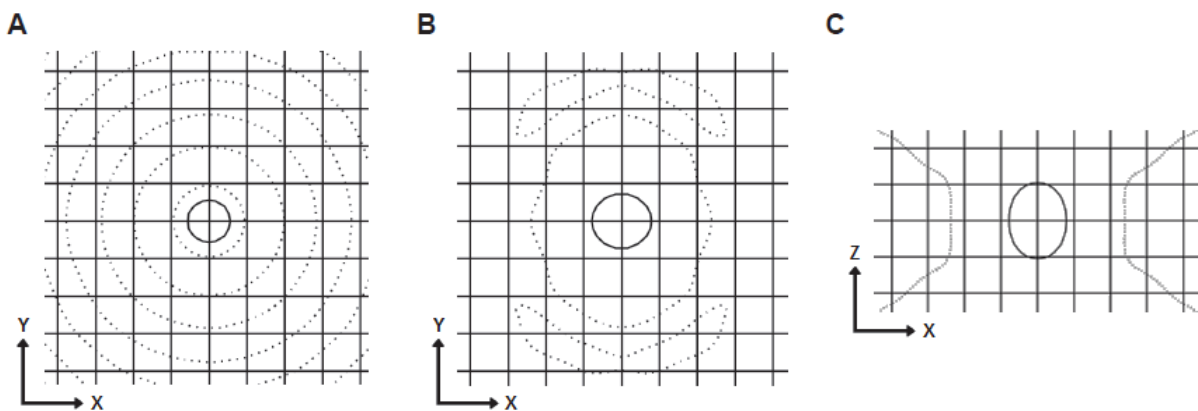

ACCEPTED MANUSCRIPT

**References**

S.J. Ludtke, P.R. Baldwin, and W. Chiu, EMAN: semiautomated software for high-resolution single-particle reconstructions, *J. Struct. Biol.* **128** (1999), pp. 82-97.

M. van Heel, G. Harauz, E.V. Orlova, R. Schmidt, and M. Schatz, A new generation of the IMAGIC image processing system, *J. Struct. Biol.* **116** (1996), pp. 17-24.
